1 **Tumor Edge-to-Core Transition Promotes Malignancy in**  
2 **Primary-to-Recurrent Glioblastoma Progression in a**  
3 **PLAGL1/CD109-mediated mechanism**

4  
5 Chaoxi Li, MD<sup>1\*</sup>; Hee Jin Cho, PhD<sup>2,3\*</sup>; Daisuke Yamashita, MD, PhD<sup>4\*</sup>; Moaaz Abdelrashid, MD<sup>5</sup>;  
6 Qin Chen, MD<sup>6</sup>; Soniya Bastola, PhD<sup>7</sup>; Gustavo Chagoya, MD<sup>8</sup>; Galal A. Elsayed, MD<sup>8</sup>;  
7 Svetlana Komarova, PhD<sup>8</sup>; Saya Ozaki, MD<sup>4</sup>; Yoshihiro Ohtsuka, MD<sup>4</sup>; Takeharu Kunieda, MD,  
8 PhD<sup>4</sup>; Harley I Kornblum, MD, PhD<sup>7</sup>; Toru Kondo, PhD<sup>9</sup>; Do-Hyun Nam, MD, PhD<sup>2,3,10#</sup>; and Ichiro  
9 Nakano, MD, PhD<sup>4,11#</sup>

10  
11 <sup>1</sup>Department of Neurosurgery, Tongji Hospital, Tongji Medical College, Huazhong University of  
12 Science and Technology, Wuhan, Hubei, China

13 <sup>2</sup>Research Institute for Future Medicine, Samsung Medical Center, Seoul, Republic of Korea

14 <sup>3</sup>Institute for Refractory Cancer Research, Samsung Medical Center, Sungkyunkwan University  
15 School of Medicine, Seoul, Republic of Korea

16 <sup>4</sup>Department of Neurosurgery, Ehime University, Japan

17 <sup>5</sup>Department of Neurology, University of Alabama at Birmingham, Birmingham, AL, USA

18 <sup>6</sup>Department of Geriatrics, Tongji Hospital, Tongji Medical College, Huazhong University of  
19 Science and Technology, Wuhan, Hubei, China

20 <sup>7</sup>Intellectual and Developmental Disabilities Research Center, David Geffen School of Medicine  
21 at UCLA, Los Angeles, CA, USA

22 <sup>8</sup>Department of Neurosurgery, University of Alabama at Birmingham, Birmingham, AL, USA

23 <sup>9</sup>Division of Stem Cell Biology, Institute for Genetic Medicine, Hokkaido University, Sapporo,  
24 Hokkaido, Japan

25 <sup>10</sup>Department of Neurosurgery, Samsung Medical Center, Sungkyunkwan University School of  
26 Medicine, Seoul, Republic of Korea

27 <sup>11</sup>Research and Development Center for Precision Medicine, Tsukuba University, Japan

28

29 **Running Title:** Tumor Edge-to-Core Transition in glioblastomas

30

31 **#Corresponding Authors:**

32 Ichiro Nakano, MD, PhD

33 Research and Development Center for Precision Medicine, Tsukuba University

34 1-2 Kasuga Tsukuba Ibaragi 305-8550

35 E-mail: nakano.ichiro.fw@u.tsukuba.ac.jp

36

37 Do-Hyun Nam, MD

38 Department of Neurosurgery, Samsung Medical Center, Sungkyunkwan University School of  
39 Medicine, Seoul, Republic of Korea

40

41 \*These authors contributed equally to this work

42

43 **Funding**

44 This study was supported by National Institutes of Health (NIH) grants to I.N. (R01NS083767,  
45 R01NS087913, R01CA183991, and R01CA201402), a grant from the Korea Health Technology  
46 R&D Project through the Korea Health Industry Development Institute (KHIDI), funded by the  
47 Ministry of Health & Welfare, Republic of Korea (HI14C3418) to D.H.N., and a grant from the Dr.  
48 Miriam and Sheldon G. Adelson Medical Research Foundation to H.I.K.

49

50 **Conflict of Interest**

51 The authors report no conflict of interest concerning the materials or the methods used in this  
52 study or the findings specified in this paper.

53

#### 54 **Authorship Statement**

55 Leading conceptualization of the study: IN. Financial support: DHN, IN. Laboratory practice: CL,  
56 QC, SY, SK, SG. Bioinformatic analysis: CL, HJC, DY, DHN, IN. Schematic drawing of  
57 hypothesis (**Fig. 5**): IN. Drafting the article: CL, IN. Critical revision of the article: HIK, DHN, IN.  
58 All authors had substantial input to the logistics of the work and revised and approved the final  
59 manuscript. The authors know their accountability for all aspects of the study ensuring that  
60 questions regarding the accuracy and integrity of any part are appropriately investigated and  
61 resolved. The corresponding authors had full access to all of the data and the final responsibility  
62 to submit the publication.

63

#### 64 **Counts:**

65 Abstract: 250 words

66 Importance of the Study: 107 words

67 Total Text: 6046 words

68 References: 37

69 Display items: 5 main figures, 1 table, 7 supplementary figures, 4 supplementary tables.

## 70 **Abstract**

71 **Background:** Glioblastoma remains highly lethal due to its inevitable recurrence. This  
72 recurrence is found locally in most cases, indicating that post-surgical tumor-initiating cells  
73 (TICs) accumulate at tumor edge. These edge TICs then generate recurrent tumors harboring  
74 new core lesions. Here, we investigated the clinical significance of the edge-to-core transition  
75 (ECT) signature causing glioblastoma recurrence and sought to identify central mediators for  
76 ECT.

77 **Methods:** First, we examined the association of the ETC-related expression changes and  
78 patient outcome in matched primary and recurrent samples (n=37). Specifically, we tested  
79 whether the combined decrease of the edge TIC marker PROM1 (CD133) with the increase of  
80 the core TIC marker CD109 representing ECT during the primary-to-recurrence progression  
81 indicates poorer patient outcome. We then investigated the specific molecular mediators that  
82 trigger tumor recurrence driven by the ECT signature. Subsequently, the functional and  
83 translational significance of the identified molecule was validated within our patient-derived  
84 tumor edge-TIC models *in vitro* and *in vivo*.

85 **Results:** Patients exhibiting a CD133<sup>down</sup>/CD109<sup>up</sup> signature during recurrence representing  
86 ECT displayed a strong association with poorer progression-free survival and overall survival  
87 among all tested patients. Differential gene expression identified that PLAGL1 was tightly  
88 correlated with the core TIC marker CD109 and was linked to a shorter survival of glioblastoma  
89 patients. Experimentally, forced PLAGL1 overexpression enhanced, while its knockdown  
90 reduced, the glioblastoma edge-derived tumor growth *in vivo* and subsequent mouse survival,  
91 suggesting its essential role in the ECT-mediated glioblastoma development.

92 **Conclusions:** ECT is likely an ongoing lethal process in primary glioblastoma contributing to its  
93 recurrence partly in a PLAGL1/CD109-mediated mechanism.

94

95

96 **Key Words:** recurrence-initiating cell, glioma stem cell, cancer stem cell, spatial identity

97

98 **Key Points**

99 1. ECT is a pathobiological process contributing to glioblastoma lethality

100 2. The CD133<sup>down</sup>/CD109<sup>up</sup> signature is a novel prognostic molecular biomarker in ECT

101 3. PLAGL1 regulates growth of edge-located tumor-initiating cells

102

103 **Importance of the Study:**

104 Very few studies have sought to longitudinally characterize the transition of molecular

105 landscapes from primary to recurrent glioblastoma. Post-surgical edge-located TICs are

106 presumably the predominant source of tumor recurrence, yet this cellular subpopulation in

107 glioblastoma remains largely uncharacterized. This study evaluates the significance of

108 glioblastoma edge-derived core transition (ECT) for tumor recurrence in the primary-recurrent

109 paired sample set. We elucidate a prognostically-significant shift in molecular and cellular

110 phenotypes associated with ECT in the CD133<sup>down</sup>/CD109<sup>up</sup> group. Moreover, our results

111 provide clinical and experimental evidence that PLAGL1 is a mediator of glioblastoma ECT and

112 its subsequent tumor development by the direct transcriptional regulation of the core TIC marker

113 CD109.

114

## 115 Introduction

116 Glioblastoma is an incurable universally lethal disease<sup>1</sup> and characterized by inter- and intra-  
117 tumoral heterogeneity<sup>2-6</sup>. Transcriptome-based subtyping of individual tumors is considered a  
118 milestone discovery of the past decade<sup>7,8</sup>; nonetheless, this molecular subtyping has yet to  
119 change clinical management, unlike other cancers that now have distinct treatment options  
120 instructed by particular genetic subtype information (e.g. breast cancer, neuroblastoma)<sup>9,10</sup>. In  
121 sharp contrast to the accumulating experimental evidence for the mesenchymal shift of  
122 glioblastoma tumors being tightly associated with a gain of malignancy and therapy resistance  
123 in various model systems, clinical data remains lacking to suggest that mesenchymal  
124 glioblastoma gains benefit from more extensive and/or different therapies. In addition, multiple  
125 independent large-scale studies have clarified that the transcriptomic subtype switch between  
126 primary and recurrent glioblastomas is simply a random event without any clear trend of one  
127 way or the other including toward the mesenchymal shift<sup>11</sup>.

128 Most glioblastomas recur within a few years as the main cause of its dismal prognosis in  
129 the developed countries<sup>12</sup>. The large degrees of molecular difference between primary and  
130 recurrent tumors have been recognized by various OMICs analyses including deep sequencing,  
131 both with tumor tissues<sup>13,14</sup> and at the single cell level<sup>15</sup>. Since the brain tissues adjacent to  
132 surgical resection are the most frequent sites of tumor recurrence, the normal parenchyma-  
133 tumor core interface (tumor edge) presumably contains post-surgical tumor-initiating cells (TICs;  
134 also termed recurrence-initiating cells) after craniotomy. Molecular and, more importantly,  
135 phenotypic characterization of these edge-TICs may lead to the identification of a means to  
136 inhibit the process of tumor recurrence following craniotomy.

137 Diffuse infiltrative glioblastomas, when they recur, are detected by the propagation of  
138 new tumor core lesions, indicating the edge-to-core transition (ECT) is likely critical step toward  
139 patient lethality. Nonetheless, these lethal seeds for tumor recurrence are mostly, if not entirely,

140 surgically-untouchable due to the presence of intermingled normal functional brain cells  
141 including neurons. In fact, despite recent advances in surgical technology increasing the extent  
142 of resection of the core lesion with the neuro-radiological confirmation of nearly 100% resection  
143 of the enhancing abnormality on post-operative MRI, the improvement of post-surgical patient  
144 survival remains marginal. Therefore, further attention needs to be placed on the remaining  
145 edge lesions (T2/FLAIR abnormality without Gadolinium enhancement on MRI) and ECT during  
146 recurrent tumor development as a clinically-significant consequence of treatment failure to  
147 glioblastoma. In order to uncover the functional roles of tumor cells within this edge  
148 microenvironment, our recent studies have undertaken a program to isolate and characterize  
149 regionally-distinct tumor cell populations by using awake surgery to obtain reasonable amounts  
150 of edge tissues without harming patients, allowing us to functional identify CD133 and CD109 as  
151 the representative molecules to mark the *edge*-located and *acquired core*-associated TICs,  
152 respectively<sup>3,16-18</sup>.

153         In the current study, we investigated this presumptive transition of CD133<sup>high</sup>/CD109<sup>low</sup>  
154 cells to CD133<sup>low</sup>/CD109<sup>high</sup> cells as the representative of highly-lethal ECT dynamics by using  
155 37 pairs of samples from matched primary and recurrent glioblastoma tumors. We then  
156 postulated that the decline of CD133 expressing TICs and the increase of CD109-expressing  
157 TICs indicates active ECT progression, worsening the patients' prognosis. To test this idea, we  
158 segregated our longitudinal sample set into two groups based on the CD133/109 expression  
159 changes. A set of integrated multimodal analyses was performed, followed by the pre-clinical  
160 validation of the identified molecular target as a functional key determinant for ECT-related  
161 glioblastoma aggressiveness.

162

163

## 164 **Materials and Methods**

## 165 **Patients, Specimens, and Ethics**

166 All 37 longitudinal glioblastoma cases were treated at Samsung Medical Center and Seoul  
167 National University Hospital and the tumor tissues were collected for research under the  
168 approved institutional review boards. Detailed methods are described in the previous study<sup>19</sup>  
169 and Supplementary material. For the pre-clinical studies, four patient-derived glioma sphere  
170 models were used, including three pair of tumor core- and edge-derived ones (1051E and C,  
171 1053E and C, 0573E and C) as well as one tumor edge-derived sphere line (101027E), which  
172 were established and described elsewhere<sup>3,16-18,20-22</sup>. In short, with the signed patient consent,  
173 the senior author (IN) performed supra-total resection of glioblastoma tumors under the awake  
174 setting and resected both tumor core (T1-Gadolinium(+) tumors) and edge (T1-Gadolinium(-  
175 )/T2-FLAIR abnormal tumors in the non-eloquent deep white matter) to achieve maximal tumor  
176 cell eradication without causing any permanent major deficit in the patients (Supplementary  
177 Fig.1A). After the confirmation of enough tumor tissues from both lesions secured for the clinical  
178 diagnosis, remaining tissues were provided to the corresponding scientists following de-  
179 identification of the patient information. Both the core-derived and edge-derived glioma spheres  
180 were established in the same culture condition<sup>3,16-18,20-23</sup> and their spatial identities, termed *core-*  
181 *ness* and *edge-ness*, were confirmed by a set of xenografting experiments into mouse brains  
182 (details described in<sup>18</sup>). Only those that passed this confirmation were used for this study. The  
183 other patient-derived glioma sphere models were established as "core-like glioma spheres"  
184 using the same protocol and reported elsewhere<sup>18</sup>. All these patient-derived glioma models  
185 were periodically checked with the mycoplasma test and the Short Tandem Repeat (STR)  
186 analysis. All work related to pre-clinical data was performed under an Institutional Review Board  
187 (IRB)-approved protocol (N150219008) compliant with guidelines set forth by National Institutes  
188 of Health (NIH).

189

## 190 **Public Microarray Data Processing**



191 Three RNA sequencing datasets were downloaded from the Gene Expression Omnibus  
192 database(<https://www.ncbi.nlm.nih.gov/geo/>), including GSE63035, GSE67089 and  
193 GSE113149<sup>17,23,24</sup>. RNA sequencing data of 29 longitudinal samples are derived from  
194 GSE63035, and 8 longitudinal samples are newly added, all the samples are IDH-wild type. The  
195 GSE67089 datasets contained gene expression data of MES, PN glioma sphere cells and  
196 Neuron progenitor cells. The GSE113149 included the microarray data for sh-NT versus sh-  
197 CD109 in glioblastoma sphere 267. The RNA sequencing data of TCGA database was acquired  
198 from the TCGA Research Network (<https://www.cancer.gov/tc-ga.>) and visualized by Gliovis<sup>25</sup>  
199 (<http://gliovis.bioinfo.cnio.es/>).

200

#### 201 ***In vitro* experiments**

202 Detailed methods are described in the Supplementary material.

#### 203 ***in vivo* mouse experiments**

204 All animal experiments were performed at UAB under the Institutional Animal Care and Use  
205 Committee (IACUC)-approved protocol according to NIH guidelines. Detailed methods are described  
206 in the Supplementary material.

207

#### 208 **Statistical Analysis**

209 All data are presented as mean  $\pm$  SD. The number of replicates for each experiment was stated  
210 in Figure legends. Statistical differences between two groups were evaluated by two tailed *t*-test.  
211 The statistical significance of Kaplan–Meier survival plot was determined by log-rank analysis. A  
212 statistical correlation was performed to calculate the regression  $R^2$  value and Pearson's  
213 correlation coefficient. Statistical analysis was performed by Prism 8 (GraphPad Software),  
214 unless mentioned otherwise in figure legend.  $P < 0.05$  was considered as statistically significant.

215

216 **Results**

217 **Patients in CD133<sup>down</sup>/CD109<sup>up</sup> group exhibit worse prognoses with a trend towards an**  
218 **increased mesenchymal signature**

219 Based on our previous data<sup>17,18</sup>, we used CD133 mRNA and CD109 mRNA to indicate edge-  
220 ness and core-ness, respectively, a concept that we validated with 19 paired GBM edge- and  
221 core-samples(**Supplementary Fig. 2**). We reasoned that the loss of CD133 mRNA  
222 (CD133<sup>down</sup>) and gain of CD109 (CD109<sup>up</sup>) were indicative of the edge-to-core transition in  
223 glioblastoma. Based on the differential RNA expression profiles as determined by RNA-  
224 sequencing (seq) of 37 primary and recurrent glioblastoma pairs, 15 patients were assigned to  
225 the CD133<sup>down</sup>/CD109<sup>up</sup> group as representative of ECT, while the other 22 patients were  
226 assigned as control arms (Others, either CD133<sup>down</sup>/CD109<sup>down</sup>, CD133<sup>up</sup>/CD109<sup>down</sup>, or  
227 CD133<sup>up</sup>/CD109<sup>down</sup>) for comparison. Both groups displayed similar average age, sex, distant  
228 recurrence profiles, and post-surgical therapy regimens. (**Table 1, Supplementary Table 1**).  
229 We then investigated the progression-free survival and overall survival in these four groups. The  
230 CD133<sup>down</sup>/CD109<sup>up</sup> group exhibited a substantially worse progression-free survival ( $p=0.024$ )  
231 and overall survival ( $p=0.043$ ) compared with others(**Fig. 1A**). Consistent with recent studies,  
232 both primary and recurrent tumors showed no significant difference in proportion among the  
233 three transcriptomic subtypes<sup>6</sup>. However, there was a trend that CD133<sup>down</sup>/CD109<sup>up</sup> group was  
234 enriched in tumors of the mesenchymal subtypes upon recurrence ( $p=0.028$ ) (**Fig. 1B**).  
235 Nonetheless, in this patient cohort, the mesenchymal-ness of either primary or recurrent tumors  
236 did not show statistically-significant differences in prognosis. These findings suggested a  
237 significant association between the CD133<sup>down</sup>/CD109<sup>up</sup> signature representing ECT and poorer  
238 patient prognoses, associated with increase of the mesenchymal subtype in the primary-to-  
239 recurrent glioblastoma progression.

240

241 **Longitudinal RNA-seq analysis identifies the differential expression profile associated**  
242 **with ECT including PLAGL1 and CD109**

243 Next, we pursued a stepwise approach to identify a molecular target or targets that could  
244 mediate the observed molecular and phenotypic dynamics of ECT. First, we established a data  
245 analysis pipeline using all expressed genes in the RNA-seq data of the 37 longitudinal cases  
246 (n=22,255) (**Fig. 2A**). Differential gene expression analysis identified 26 genes distinctively  
247 associated with the CD133<sup>down</sup>/CD109<sup>up</sup> changes (**Supplementary Table 2**). Unsupervised  
248 hierarchical clustering of those genes (n=155) segregated our cohort sample (n=37) into two  
249 distinctive subgroups (up- and down-regulated) (**Fig. 2B, C**). In order to further elucidate the  
250 essential molecules governing ECT, we designed an integrated second step approach to  
251 evaluate the expression of these 26 up-regulated genes in our well-characterized glioma sphere  
252 models treated with either shRNA-based gene silencing of CD109 or flow cytometry to isolate  
253 CD109(+) cells. To this end, we used our recently-published RNA-seq data with two well-  
254 characterized tumor core-like glioma sphere models; g267 for shRNA and g1005 for flow  
255 cytometry<sup>17</sup>. As a result, *PLAGL1* was identified as being the gene whose expression most  
256 strongly correlated with that of *CD109* ( $FC > 1.5$ ,  $p < 0.05$ ) (**Fig. 2A, D, Supplementary Fig. 3A,**  
257 **B**). Consistently, Pearson's correlation analysis of the 37 glioblastoma paired samples indicated  
258 a strong linear relationship between *CD109* and *PLAGL1* relative expression ( $r = 0.7$ ,  $p < 0.05$ )  
259 (**Fig. 2E**). This *CD109-PLAGL1* expression correlation was also observed in four clinical  
260 datasets (TCGA, Rembrandt, CGGA, and CGGA GBM datasets) (**Fig. 2F**). qRT-PCR with two  
261 additional edge- and core-derived glioma sphere models (Edge- and Core-derived g1053  
262 spheres and g0573 spheres) showed that both *PLAGL1* and *CD109* were higher in the core-  
263 derived, yet *CD133* was up in the edge-derived, glioma spheres *in vitro* (**Fig. 2G**).

264 To prospectively assess *PLAGL1* localization in experimental tumors, we injected edge-  
265 or core-derived glioma spheres from 3 patients into immunodeficient mice. *PLAGL1* showed its  
266 preferential expression in the tumor core-derived lesions (patient n=3) (**Fig. 2H**). In the patient

267 tumor data in TCGA, *PLAGL1* mRNA expression was relatively higher in glioblastomas  
268 compared to lower grade gliomas (**Fig. 2I**). In glioblastoma, *PLAGL1* mRNA was enriched in  
269 mesenchymal tumors (**Fig. 2J**). As expected, glioblastoma patients with higher *PLAGL1*  
270 expression exhibited shorter survival in the TCGA database (**Fig. 2K**).

271         Since the *PLAGL1* gene encodes for C2H2 zinc finger (ZF) transcription factors (TFs)<sup>26</sup>,  
272 we sought to further confirm our results by cross-referencing them to our previously-established  
273 cDNA microarray dataset with the sphere lines established from either human neonatal brains  
274 (neural progenitors: NPs) or glioma patients with mesenchymal or core-like signature<sup>23</sup>. Among  
275 2,766 human TFs<sup>27</sup>, 12 TFs, including *PLAGL1*, were highly overexpressed (fold change >15) in  
276 mesenchymal or core-like glioma sphere lines as opposed to NP counterparts ( $p < 0.001$ ) (**Fig.**  
277 **2L**), moreover, *PLAGL1* was the second highest C2H2-ZF TFs in MES cells (**Supplementary**  
278 **Fig.4**). Consistently, a volcano plot displayed *PLAGL1* as a significantly upregulated gene in  
279 mesenchymal or core-like glioma spheres (**Fig. 4M**). Gene set enrichment analysis (GSEA)  
280 using the 26 upregulated genes identified their association with "HDAC1 targets" and "UV  
281 response DNA damage", both of which our recent studies have identified as pathways tightly  
282 correlated to CD109-driven signals in glioblastoma and their TIC models (**Fig.4N**)<sup>17,18</sup>. Finally,  
283 we explored the expression of *PLAGL1* in primary GBM edge, core lesions as well as their  
284 subsequent recurrent core tissues, which showed *PLAGL1* higher in the core lesions in both  
285 primary recurrent tumors (**Fig. 4O**). Collectively, these clinical and experimental data suggested  
286 *PLAGL1* is possibly one key regulator in the edge-TICs to cause tumor core development in  
287 glioblastoma.

288

289 **Genetic perturbation of *PLAGL1* reveals its role in glioblastoma tumorigenicity in the**  
290 **edge-TIC models**

291 Following the identification of PLAGL1 as a potential candidate regulating the ECT-mediated  
292 glioblastoma malignancy, we investigated the function of PLAGL1 in our glioblastoma edge-TIC  
293 models to understand if its targeting holds any translational significance. To this end, we used  
294 the two tumor edge-derived glioma sphere models (1051E and 101027E) for lentivirus-mediated  
295 gene overexpression (PLAGL1-OE) and knockdown by shRNA (sh#1 and #2). As the control,  
296 we used the non-targeting lentiviral construct (Ctrl). Western blotting confirmed both induced  
297 overexpression and gene silencing in cells harboring the shRNA construct, with more efficient  
298 targeting of PLAGL1 by sh#2 than sh#1 (**Fig. 3A, Supplementary 5.A**). In both models,  
299 PLAGL1-OE displayed significantly higher *in vitro* growth rates, while their growth was largely  
300 attenuated by gene silencing of PLAGL1 (**Fig. 3B**). Using clonal sphere formation as a  
301 surrogate *in vitro* indicator of tumor initiating capacity, we found that PLAGL1-OE glioma  
302 spheres relatively increased, whereas its gene silencing reduced it with a greater inhibitory  
303 effect of sh#2 compared to sh#1 (**Fig. 3C, D, Supplementary Fig. 5B**). *In vivo* injection of  
304 PLAGL1-OE glioma spheres into brains of SCID mice resulted in higher luminescent intensity  
305 indicative of their larger tumor sizes by edge-TIC-derived tumor establishment, whereas the  
306 shRNA-carrying xenografts displayed significantly lower signals in both of these two  
307 glioblastoma edge sphere-derived tumor models (**Fig. 3E**). Mice with PLAGL1-OE glioma  
308 sphere-derived tumors exhibited significantly worse survival with higher tumor burden, while  
309 their gene silencing groups displayed improved overall survival with lower tumor burden  
310 compared to the control group (**Fig. 3F, Supplementary Fig.6**). As expected, immunoreactivity  
311 to CD109 was strongly correlated with the expression of PLAGL1 in both models (**Fig. 3G**).  
312 Collectively, this data suggested that PLAGL1 regulates the *in vitro* clonality and *in vivo* tumor  
313 development originally derived from edge-TICs.

314

315 **PLAGL1 binds to the promoter region for CD109 to regulate its transcriptional activity**

316 Lastly, we sought to determine the molecular mechanisms linking the expression of PLAGL1  
317 and CD109. Specifically, we tested if PLAGL1 binds to the promoter region for the CD109 gene  
318 in glioblastoma edge-derived cells. Using g1051E spheres, we performed chromatin-  
319 immunoprecipitation with the PLAGL1 antibody, followed by qRT-PCR for the CD109 genetic  
320 regulatory element that we previously identified as its active promoter<sup>17</sup> and detected a band  
321 indicative of the direct transcriptional regulation of CD109 by PLAGL1 in glioblastoma edge-  
322 derived cells. This result was also validated with g101027E cells (**Fig.4A**). As expected,  
323 overexpression of PLAGL1 elevates, while its silencing decreases, the expression of CD109  
324 protein, determined by western blotting in both sphere models (**Fig.4B**). Collectively, the tightly  
325 associated co-expression of PLAGL1-CD109 was, at least in part, mediated through the direct  
326 transcriptional regulation of CD109 *via* the TF, PLAGL1.

327

## 328 Discussion

329 Patients with glioblastoma gain only limited benefit from craniotomy due to the inability to  
330 completely eliminate tumor cells from the brain<sup>28,29</sup>. The lethal seeds for tumor recurrence  
331 (recurrence-initiating cells) reside predominantly, yet not entirely, at the tumor edge surrounding  
332 the resection cavity. In this study, we used CD133 and CD109 expression changes as a  
333 reference to indicate ECT. The rationale for this investigation included our previous finding that  
334 CD133 and CD109 are preferentially expressed within the TIC subpopulations, selectively within  
335 glioblastoma edge- and core-tissues, respectively<sup>17</sup>. While expression of CD109 and CD133  
336 within individual cells in tumors appear to be mutually-exclusive, previous studies indicate that  
337 expression of these markers represents a dynamic molecular state<sup>6</sup>. One means of affecting  
338 ECT is through radiation, which induces the conversion of edge-associated CD133(+)/CD109(-)  
339 cells to the core-associated CD133(-)/CD109(+) cells, thereby developing therapy-resistant  
340 tumors *in vivo*. On the other hand, core CD133(-)/CD109(+) cells themselves respond to

341 radiation by secreting factors that promote the radiation resistance of edge-located  
342 CD133+)/CD109(-) cells *in vitro* and *in vivo*. Collectively, these prior data suggest the  
343 significance of targeting both core- and edge-TICs (marked by CD133 and CD109, respectively)  
344 to achieve better outcomes of glioblastoma treatment. However, recent advances in surgical  
345 technique, including the imaging-assisted fluorescence-guided surgery in the awake setting, has  
346 allowed us to increase the proportion of surgical cases of total or near-total resection of the  
347 tumor core lesions. Yet, edge-located tumor cells undoubtedly remain as a key therapeutic  
348 target as they are the presumptive sources of recurrent tumors.

349 In the current study, we examined 37 paired primary-recurrent tumor samples to focus on  
350 ECT, validating its association with poorer patient prognoses. It is important to note that both  
351 tumor edge and core are composed of tumor cells in all three transcriptomic subtypes, albeit the  
352 ratios are slightly different (**Fig. 5**)<sup>18</sup>. Our findings suggest, yet do not definitely prove, relatively  
353 weaker correlation of mesenchymal-ness, in comparison to the ECT signature, to patients'  
354 poorer prognosis, at least in this patient cohort. This interpretation needs further validation with  
355 more clinical evidence, ideally with prospective measurement, from multiple independent  
356 groups. The ECT axis could be more clinically-relevant but it remains poorly understood how  
357 similar to, or different from, the transcriptomic proneural (and classical)-mesenchymal axis it is.  
358 In addition, in many craniotomies, small residual core lesions are left behind. Most likely, they  
359 also contribute both directly and indirectly to the tumors to recur, as our recent study  
360 suggested<sup>18</sup>. Therefore, we need to be cautious in stating that ECT does not explain all the  
361 clinical courses of the primary-to-recurrent glioblastoma progression. More extensive molecular  
362 characterization with additional longitudinal case cohorts is warranted.

363 For the phenotypic characterization associated with tumor edge and ECT in  
364 glioblastoma, we believe that the recently-established tumor edge- and core-derived glioma  
365 spheres represent valuable models, as their xenografts faithfully recapitulate their spatially-  
366 distinct tumor lesions in mouse brains. They can allow for the study the tumor recurrence

367 formation from the mixed populations of the core and edge cells<sup>7</sup>. Needless to say, the accuracy  
368 of the resected tissue locations within the brains is critical for these spatially-identified models  
369 and a number of potential hurdles have to be overcome in order to ascertain these samples  
370 (e.g. brain shift, patient safety). In particular, glioblastomas tend to infiltrate into the deep white  
371 matter, where a number of functional neuronal fibers run throughout the brain. Obtaining tumor  
372 edge tissues from these regions without harming the patients is a critical step in allowing us to  
373 establish models that faithfully recapitulate their spatially-distinct pathobiology. Further  
374 characterization of our models and developing other tumor edge-reflective models would help  
375 facilitate the molecular and phenotypic analyses to identify therapeutic targets in the post-  
376 surgical residual tumor cells at tumor edge that subsequently cause patient lethality.

377 Our data indicated the significance of targeting PLAGL1 to attenuate, yet not completely  
378 eliminate, tumor initiation and propagation, accompanied by an impact on survival of tumor-  
379 bearing mice. As for its molecular mechanism, we found that this TF directly regulates the ECT  
380 gene CD109. Our previous studies demonstrate that CD109 drives ECT, and, thus, by inference,  
381 PLAGL1 would be expected to do the same. Nonetheless, the role of PLAGL1 in cancer has  
382 been controversial. Prior studies have shown that PLAGL1 is a tumor suppressor gene  
383 encoding an inducer of apoptosis and cell cycle arrest in various cancers<sup>30-32</sup> (e.g. breast cancer,  
384 hepatoma, colon cancer). Even in glioma, one study has demonstrated the frequent loss of  
385 PLAGL1 in their clinical samples. However, another study paradoxically demonstrated a pro-  
386 tumorigenic function of PLAGL1 driven by SOX11<sup>33,34</sup>. Here, using pre-clinical models, we  
387 provide strong evidence to support the tumorigenic function of PLAGL1 in glioblastoma TICs. In  
388 addition, the analysis of clinical samples using public and our own databases were consistent  
389 with our experimental findings. PLAGL1-mediated signaling might be context-dependent among  
390 various cancer cells, or even within gliomas. Such context-dependency is known to occur in a  
391 variety of settings, including ones directly related to these studies. We previously found that  
392 histone deacetylase 1 (HDAC1) is a positive transcriptional regulator that drives CD109 gene



393 expression *via* a protein complex formation with an oncogenic TF C/EBP $\beta$ , even though HDAC1  
394 is recognized to modulate the compact chromatin structure leading to widespread repression of  
395 transcriptional activities in cancers and developmental somatic cells<sup>35-37</sup>. It remains unknown if  
396 PLAGL1 forms a larger protein complex with HDAC1 and C/EBP $\beta$  in glioblastoma and other  
397 cancers.

398 In conclusion, this study provides a set of clinical and experimental data suggesting the  
399 significance of targeting tumor edge-located TICs that subsequently escape current therapies to  
400 develop lethal core lesions during tumor recurrence. The PLAGL1-CD109 signaling axis is likely  
401 among key drivers for ECT. As the molecular and cellular complexity of glioblastoma is  
402 increasingly recognized as a challenging road block to prolong survival of patients, successful  
403 removal of tumor core is certainly the mandated first-step, yet it still requires us to learn how to  
404 manage the tumor edge in better ways. Further phenotypic characterization of edge-TICs is  
405 among key tasks ahead of us to develop effective therapies for glioblastoma.

406

## 407 **Acknowledgments**

408 We would like to express our sincere appreciation to all the patients and families, who kindly  
409 allowed us to obtain their tumor samples for this study. We would also thank all our  
410 collaborating scientists, as well as the assigned reviewers and Editor for this manuscript, for the  
411 constructive comments and suggestions. Lastly, we acknowledge the contribution by all the  
412 members in the Nakano and Nam laboratories (past and present) for technical help, including  
413 Drs.Seungwon Choi and Harim Koo for MRI acquisition and tumor location annotation works in  
414 the Nam laboratory.

415

416

417

## 418 **References**

- 419 **1.** Dirks PB, Gilbert MR, Holland EC, Maher EA, Weiss WA. Translating Basic Science  
420 Discoveries into Improved Outcomes for Glioblastoma. *Clin Cancer Res.* 2020;  
421 26(11):2457-2460.
- 422 **2.** Stupp R, Mason WP, van den Bent MJ, et al. Radiotherapy plus concomitant and  
423 adjuvant temozolomide for glioblastoma. *N Engl J Med.* 2005; 352(10):987-996.
- 424 **3.** Bernstock JD, Mooney JH, Ilyas A, et al. Molecular and cellular intratumoral  
425 heterogeneity in primary glioblastoma: clinical and translational implications. *J*  
426 *Neurosurg.* 2019:1-9.
- 427 **4.** Patel AP, Tirosh I, Trombetta JJ, et al. Single-cell RNA-seq highlights intratumoral  
428 heterogeneity in primary glioblastoma. *Science.* 2014; 344(6190):1396-1401.
- 429 **5.** Jin X, Kim LJY, Wu Q, et al. Targeting glioma stem cells through combined BMI1 and  
430 EZH2 inhibition. *Nat Med.* 2017; 23(11):1352-1361.
- 431 **6.** Behnan J, Finocchiaro G, Hanna G. The landscape of the mesenchymal signature in  
432 brain tumours. *Brain.* 2019; 142(4):847-866.
- 433 **7.** Verhaak RG, Hoadley KA, Purdom E, et al. Integrated genomic analysis identifies  
434 clinically relevant subtypes of glioblastoma characterized by abnormalities in  
435 PDGFRA, IDH1, EGFR, and NF1. *Cancer Cell.* 2010; 17(1):98-110.
- 436 **8.** Wang Q, Hu B, Hu X, et al. Tumor Evolution of Glioma-Intrinsic Gene Expression  
437 Subtypes Associates with Immunological Changes in the Microenvironment. *Cancer*  
438 *Cell.* 2017; 32(1):42-56 e46.

- 439 **9.** Lehmann BD, Bauer JA, Chen X, et al. Identification of human triple-negative breast  
440 cancer subtypes and preclinical models for selection of targeted therapies. *J Clin*  
441 *Invest.* 2011; 121(7):2750-2767.
- 442 **10.** Shimada H, Chatten J, Newton WA, Jr., et al. Histopathologic prognostic factors in  
443 neuroblastic tumors: definition of subtypes of ganglioneuroblastoma and an age-  
444 linked classification of neuroblastomas. *J Natl Cancer Inst.* 1984; 73(2):405-416.
- 445 **11.** Barthel FP, Johnson KC, Varn FS, et al. Longitudinal molecular trajectories of diffuse  
446 glioma in adults. *Nature.* 2019; 576(7785):112-120.
- 447 **12.** Thakkar JP, Dolecek TA, Horbinski C, et al. Epidemiologic and molecular prognostic  
448 review of glioblastoma. *Cancer Epidemiol Biomarkers Prev.* 2014; 23(10):1985-1996.
- 449 **13.** Kim H, Zheng S, Amini SS, et al. Whole-genome and multisector exome sequencing of  
450 primary and post-treatment glioblastoma reveals patterns of tumor evolution.  
451 *Genome Res.* 2015; 25(3):316-327.
- 452 **14.** Consortium G. Glioma through the looking GLASS: molecular evolution of diffuse  
453 gliomas and the Glioma Longitudinal Analysis Consortium. *Neuro Oncol.* 2018;  
454 20(7):873-884.
- 455 **15.** Chen X, Wen Q, Stucky A, et al. Relapse pathway of glioblastoma revealed by single-  
456 cell molecular analysis. *Carcinogenesis.* 2018; 39(7):931-936.
- 457 **16.** Ibrahim AN, Yamashita D, Anderson JC, et al. Intratumoral spatial heterogeneity of  
458 BTK kinomic activity dictates distinct therapeutic response within a single  
459 glioblastoma tumor. *J Neurosurg.* 2019:1-12.
- 460 **17.** Minata M, Audia A, Shi J, et al. Phenotypic Plasticity of Invasive Edge Glioma Stem-  
461 like Cells in Response to Ionizing Radiation. *Cell Rep.* 2019; 26(7):1893-1905 e1897.

- 462 **18.** Soniya Bastola, Marat S.Pavlyukov, Daisuke Yamashita, et al. Glioma-initiating cells  
463 at tumor edge gain signals from tumor core cells to promote their malignancy. *Nat*  
464 *Commun.* 2020; (in process).
- 465 **19.** Kim J, Lee IH, Cho HJ, et al. Spatiotemporal Evolution of the Primary Glioblastoma  
466 Genome. *Cancer Cell.* 2015; 28(3):318-328.
- 467 **20.** Pavlyukov MS, Yu H, Bastola S, et al. Apoptotic Cell-Derived Extracellular Vesicles  
468 Promote Malignancy of Glioblastoma Via Intercellular Transfer of Splicing Factors.  
469 *Cancer Cell.* 2018; 34(1):119-135 e110.
- 470 **21.** Sadahiro H, Kang KD, Gibson JT, et al. Activation of the Receptor Tyrosine Kinase  
471 AXL Regulates the Immune Microenvironment in Glioblastoma. *Cancer Res.* 2018;  
472 78(11):3002-3013.
- 473 **22.** Wang J, Cheng P, Pavlyukov MS, et al. Targeting NEK2 attenuates glioblastoma  
474 growth and radioresistance by destabilizing histone methyltransferase EZH2. *J Clin*  
475 *Invest.* 2017; 127(8):3075-3089.
- 476 **23.** Mao P, Joshi K, Li J, et al. Mesenchymal glioma stem cells are maintained by activated  
477 glycolytic metabolism involving aldehyde dehydrogenase 1A3. *Proc Natl Acad Sci US*  
478 *A.* 2013; 110(21):8644-8649.
- 479 **24.** Wang J, Cazzato E, Ladewig E, et al. Clonal evolution of glioblastoma under therapy.  
480 *Nat Genet.* 2016; 48(7):768-776.
- 481 **25.** Bowman RL, Wang Q, Carro A, Verhaak RG, Squatrito M. GlioVis data portal for  
482 visualization and analysis of brain tumor expression datasets. *Neuro Oncol.* 2017;  
483 19(1):139-141.

- 484 **26.** Schmitges FW, Radovani E, Najafabadi HS, et al. Multiparameter functional diversity  
485 of human C2H2 zinc finger proteins. *Genome Res.* 2016; 26(12):1742-1752.
- 486 **27.** Lambert SA, Jolma A, Campitelli LF, et al. The Human Transcription Factors. *Cell.*  
487 2018; 175(2):598-599.
- 488 **28.** Kallenberg K, Goldmann T, Menke J, et al. Glioma infiltration of the corpus callosum:  
489 early signs detected by DTI. *J Neurooncol.* 2013; 112(2):217-222.
- 490 **29.** Prager BC, Xie Q, Bao S, Rich JN. Cancer Stem Cells: The Architects of the Tumor  
491 Ecosystem. *Cell Stem Cell.* 2019; 24(1):41-53.
- 492 **30.** Abdollahi A, Pisarcik D, Roberts D, Weinstein J, Cairns P, Hamilton TC. LOT1  
493 (PLAGL1/ZAC1), the candidate tumor suppressor gene at chromosome 6q24-25, is  
494 epigenetically regulated in cancer. *J Biol Chem.* 2003; 278(8):6041-6049.
- 495 **31.** Poulin H, Labelle Y. The PLAGL1 gene is down-regulated in human extraskeletal  
496 myxoid chondrosarcoma tumors. *Cancer Lett.* 2005; 227(2):185-191.
- 497 **32.** Valleley EM, Cordery SF, Bonthron DT. Tissue-specific imprinting of the  
498 ZAC/PLAGL1 tumour suppressor gene results from variable utilization of  
499 monoallelic and biallelic promoters. *Hum Mol Genet.* 2007; 16(8):972-981.
- 500 **33.** Hide T, Takezaki T, Nakatani Y, Nakamura H, Kuratsu J, Kondo T. Sox11 prevents  
501 tumorigenesis of glioma-initiating cells by inducing neuronal differentiation. *Cancer*  
502 *Res.* 2009; 69(20):7953-7959.
- 503 **34.** Su Z, Zang T, Liu ML, Wang LL, Niu W, Zhang CL. Reprogramming the fate of human  
504 glioma cells to impede brain tumor development. *Cell Death Dis.* 2014; 5:e1463.

- 505 **35.** Lu Q, Wang DS, Chen CS, Hu YD, Chen CS. Structure-based optimization of  
506 phenylbutyrate-derived histone deacetylase inhibitors. *J Med Chem.* 2005;  
507 48(17):5530-5535.
- 508 **36.** Wang XQ, Bai HM, Li ST, et al. Knockdown of HDAC1 expression suppresses invasion  
509 and induces apoptosis in glioma cells. *Oncotarget.* 2017; 8(29):48027-48040.
- 510 **37.** Nguyen TTT, Zhang Y, Shang E, et al. HDAC inhibitors elicit metabolic  
511 reprogramming by targeting super-enhancers in glioblastoma models. *J Clin Invest.*  
512 2020; 130(7):3699-3716.

513

## 514 **Figure Captions**

### 515 **Figure 1. CD133<sup>down</sup>/CD109<sup>up</sup> group exhibits worse prognoses accompanied by an** 516 **increase in mesenchymal signature**

517 **(A)** Kaplan-Meier analysis of Overall Survival (left) and Progression-Free Survival (right) of  
518 glioblastoma patients in CD133<sup>down</sup>/CD109<sup>down</sup>, CD133<sup>up</sup>/CD109<sup>down</sup>, CD133<sup>up</sup>/CD109<sup>up</sup>, and  
519 CD133<sup>down</sup>/CD109<sup>up</sup> (red, top to bottom) with each collected remaining cases (Others, blue).  
520 (Log-rank test).

521 **(B)** River-plot analysis of the molecular subtype shifts from primary to recurrence in  
522 CD133<sup>down</sup>/CD109<sup>up</sup> (upper) and others (lower). ( $p=0.028$ , Chi square test)

523

### 524 **Figure 2. Longitudinal RNA-seq analysis identifies the differential expression profile** 525 **associated with ECT including *PLAGL1* and *CD109***

526 **(A)** Schematic demonstration of the filtering procedure of *PLAGL1* from 22,255 genes.

527 **(B)** Heatmap depicting supervised hierarchical clusters of up- and down-regulated genes within  
528 recurrent glioblastomas of CD133<sup>down</sup>/CD109<sup>up</sup> and others.

529 **(C)** Volcano plot of RNA-seq data comparing CD133<sup>down</sup>/CD109<sup>up</sup> and others. Red and blue dots  
530 refer to up- and down-regulated genes in CD133<sup>down</sup>/CD109<sup>up</sup> group respectively.

531 **(D)** Scatterplot comparing expression profiles of the 26 genes from RNA-seq analysis results  
532 within our glioma sphere models; MES-g1005 (n=1) FACS-sorted into CD109 negative to  
533 positive cells and represented along the x-axis (left to right respectively), while microarray  
534 relative expression of *CD109* in MES-g267 (n=3) with shNT and shCD109 is represented along  
535 the y-axis (down- and up-ward, respectively).

536 **(E)** Scatterplot displaying the linear correlation between *CD109* and *PLAGL1* expressions in the  
537 37 longitudinal cases. Pearson correlation coefficient ( $r = 0.70$  and  $p= 1.43E-06$ ).



538 **(F)** Scatterplot displaying the linear correlation between *CD109* and *PLAGL1* expressions in 4  
539 public databases (TCGA, Rembrandt, CGGA, CGGA GBM), based on Pearson correlation test.

540 **(G)** Bar graph displaying qRT-PCR results for the expression of *CD109*, *PLAGL1*, and *CD133*  
541 within edge- and core-derived sphere culture models of 2 glioblastoma patients (g1053 and  
542 g0573). Data are means  $\pm$  SD (n=3). \*\*\* $p < 0.001$ .

543 **(H)** Representative images of immunohistochemistry (IHC) for *PLAGL1* in mouse orthotopic  
544 xenografts with tumor core- (C) and edge(E)-derived glioma sphere models from 3 patients  
545 (g0573, g1053, and g1051). Scale bar 100um.

546 **(I)** Boxplot diagram demonstrating *PLAGL1* relative mRNA expression profiles from TCGA  
547 database across different gliomas subtypes. \* $p < 0.05$ , \*\* $p < 0.01$ , and \*\*\*  $p < 0.001$ .

548 **(J)** Boxplot diagram comparing relative expression profiles of *PLAGL1* among the 3 molecular  
549 subtypes (CL, MES, and PN) of glioblastoma within TCGA database. \*\*\* $p < 0.001$ .

550 **(K)** Kaplan-Meier survival curve of glioblastoma patients in the TCGA database. Patients were  
551 categorized into a “high” or “low” expression group based on the median *PLAGL1* expression  
552 in the Agilent 4502 microarray.

553 **(L)** Heatmap of displaying expression profiles of transcription factors (TF) (n=2,766) across 4  
554 MES glioma sphere lines compared with the neural progenitor sphere line (NP) (n=3 for each  
555 cell line).

556 **(M)** Volcano plot comparing TF gene expressions (n=2,766) across MES and NP lines,  
557 highlighting *PLAGL1*.

558 **(N)** Up-regulated pathways in recurrent glioblastomas in *CD133*<sup>down</sup>/*CD109*<sup>up</sup> group.

559 **(O)** Representative IHC images for *CD109* and *PLAGL1* in primary edge and core, and  
560 recurrent core tumor tissues. Scale bar 100um.

561

562 **Figure 3. PLAGL1 overexpression enhances, while its silencing diminished, glioblastoma**  
563 **growth *in vivo*, leading to affect subsequent mouse survival in the edge-TIC models**

564 **(A)** Western blotting of two patients' tumor edge-derived glioma sphere lines (g1051E and  
565 g101027E) after transducing with overexpression vector (OE) or shRNA targeting *PLAGL1*  
566 (sh#1 or sh#2) or a nontargeting control (Ctrl).

567 **(B)** Line charts of *in vitro* growth of the indicated groups (\*\* $p < 0.01$ ,  $n = 6$ , one-way ANOVA).

568 **(C)** Representative images of the indicated glioma sphere lines after genetic transduction. Scale  
569 bar 60  $\mu\text{m}$ .

570 **(D)** Inverse linear graphs of *in vitro* clonogenicity assays (limiting dilution neurosphere formation  
571 assays) depicting the relationship between PLAGL1 expression and edge-derived GBM spheres  
572 (g1051E, g101027E). (\* $p < 0.05$ , \*\* $p < 0.01$ , ELDA analyses)

573 **(E)** Bioluminescent images (Left) and their quantifications (Right) of orthotopic mouse  
574 xenografts established by injection of indicated g1051E and g101027E glioma sphere models.  
575 (\* $p < 0.05$  and \*\* $p < 0.01$ ,  $n = 5$ , one-way ANOVA).

576 **(F)** Kaplan-Meier analysis of SCID mice harboring intracranial tumors derived from g1051E or  
577 101027E spheres transduced with either overexpressed PLAGL1 ( $n = 7$ ), Ctrl( $n = 5$ ),  
578 shPLAGL1#1( $n = 6$ ) or shPLAGL1#2 ( $n = 6$ ). \* $p < 0.05$ , \*\* $p < 0.01$ , and \*\*\*  $p < 0.001$ .

579 **(G)** IHC of indicated tumors in SCID mice for CD109 and PLAGL1. Scale bar 100 $\mu\text{m}$ .

580

581 **Figure 4. PLAGL1 binds to the promoter region for CD109 to regulate its transcriptional**  
582 **activity**

583 **(A)** ChIP-qPCR assay showing PLAGL1 binding to the promoter region for the CD109 gene in  
584 g1051E and g101027E spheres. H3K9Ac is used as a positive control.

585 **(B)** Western blotting of CD109 and PLAGL1 in g1051E and g101027E spheres after transducing  
586 with overexpression vector, shRNA targeting PLAGL1 (sh#1 or sh#2), or a non-targeting control  
587 (Ctrl).

588  
589 **Figure 5.** Schematic delineating the edge- and core-located tumor cells in glioblastoma together  
590 with intra-tumoral CD133 and CD109 expressions in the TIC subpopulations.

## Figure 1

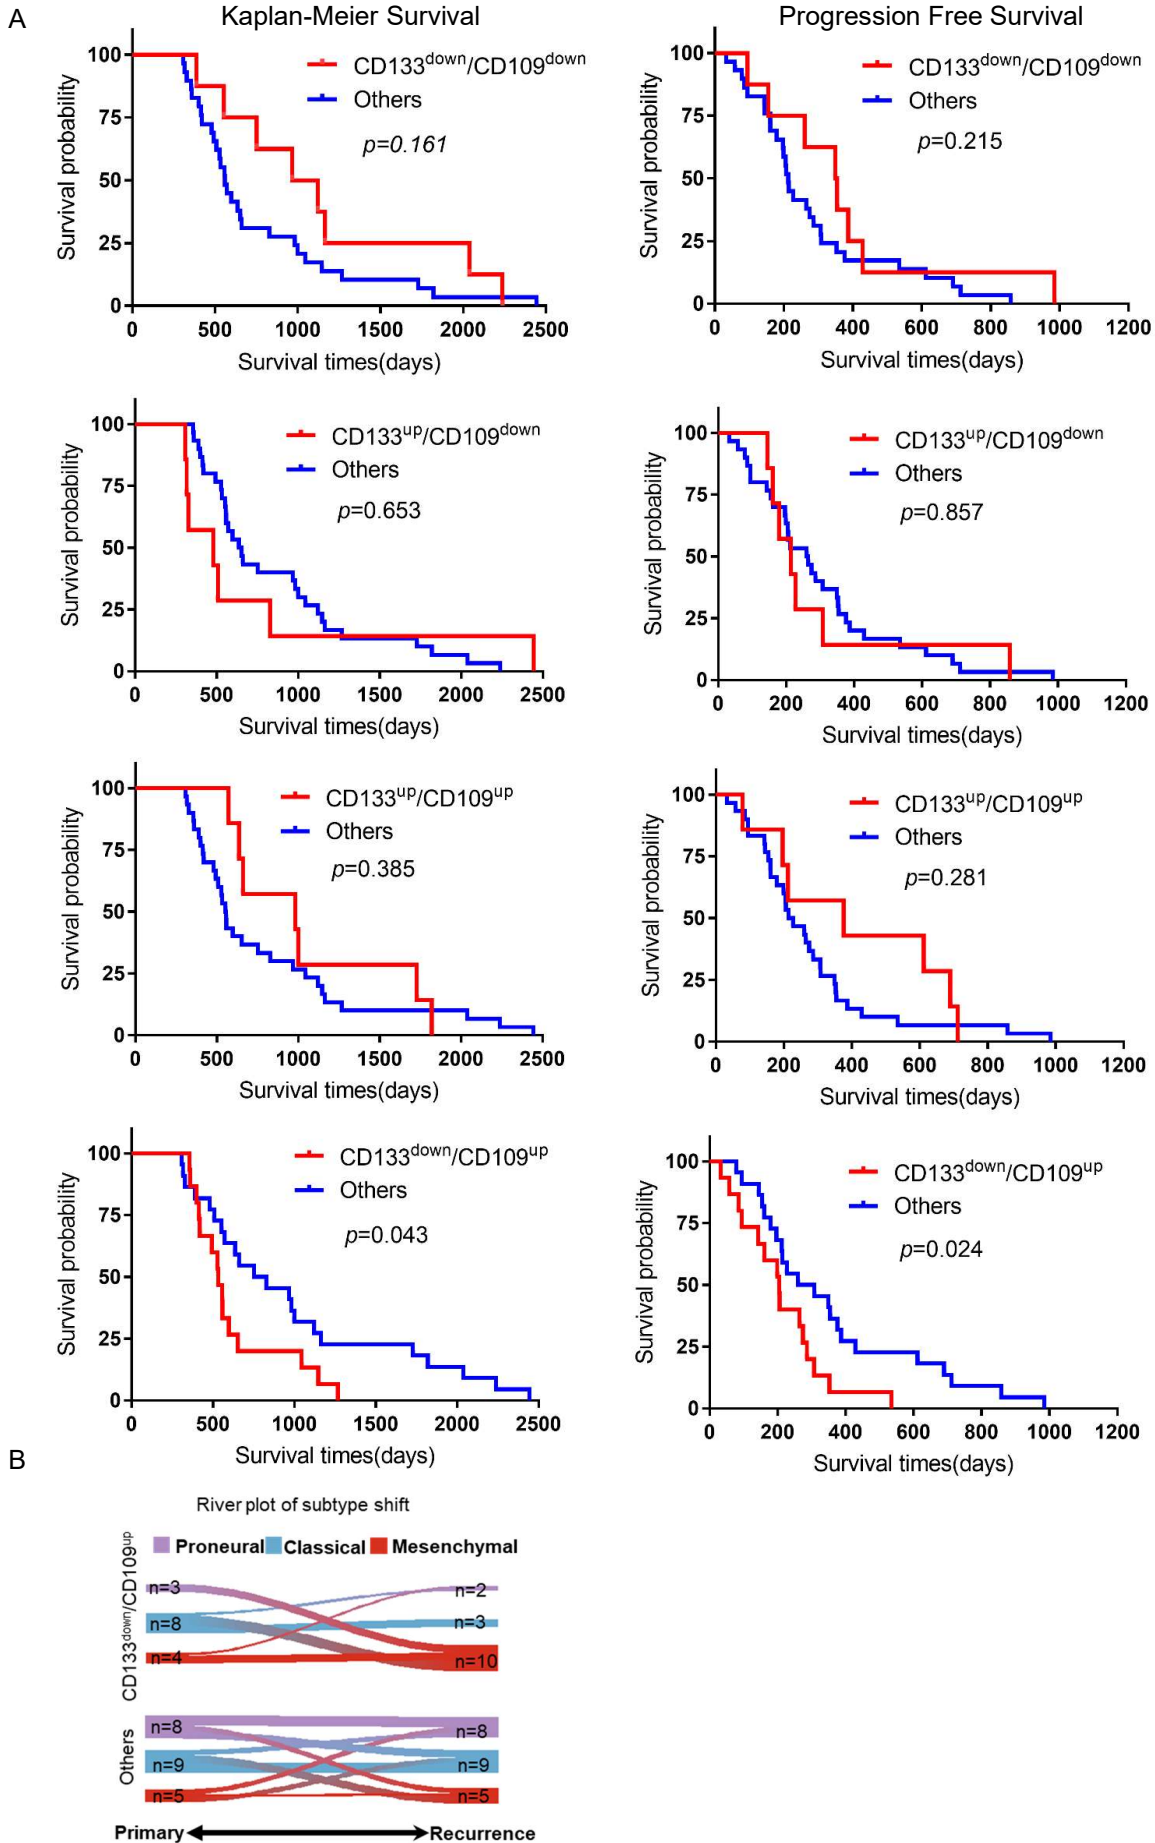

## Figure.2

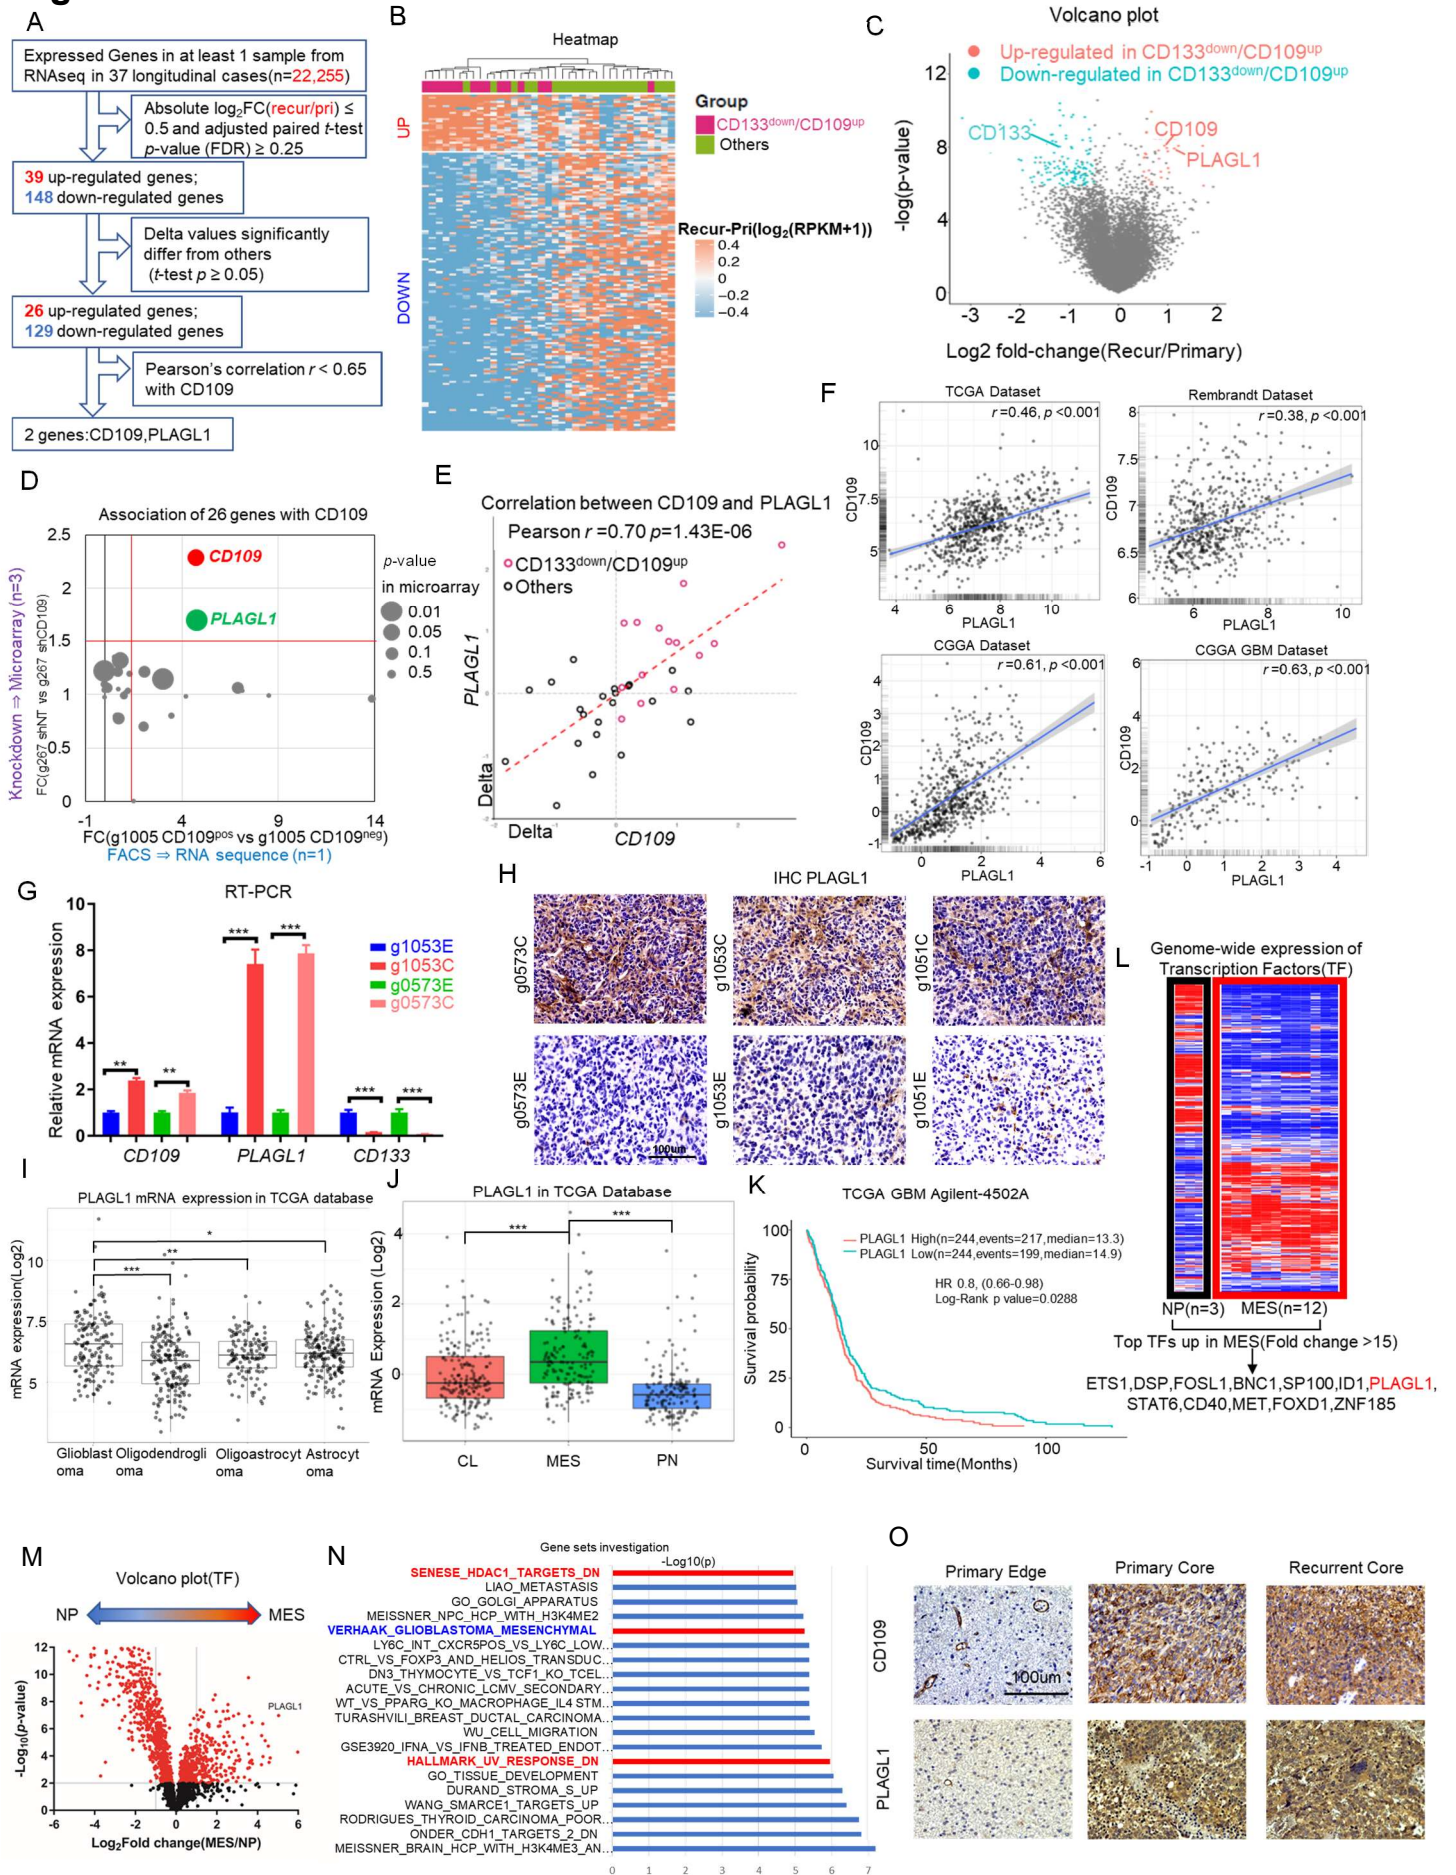

### Figure 3

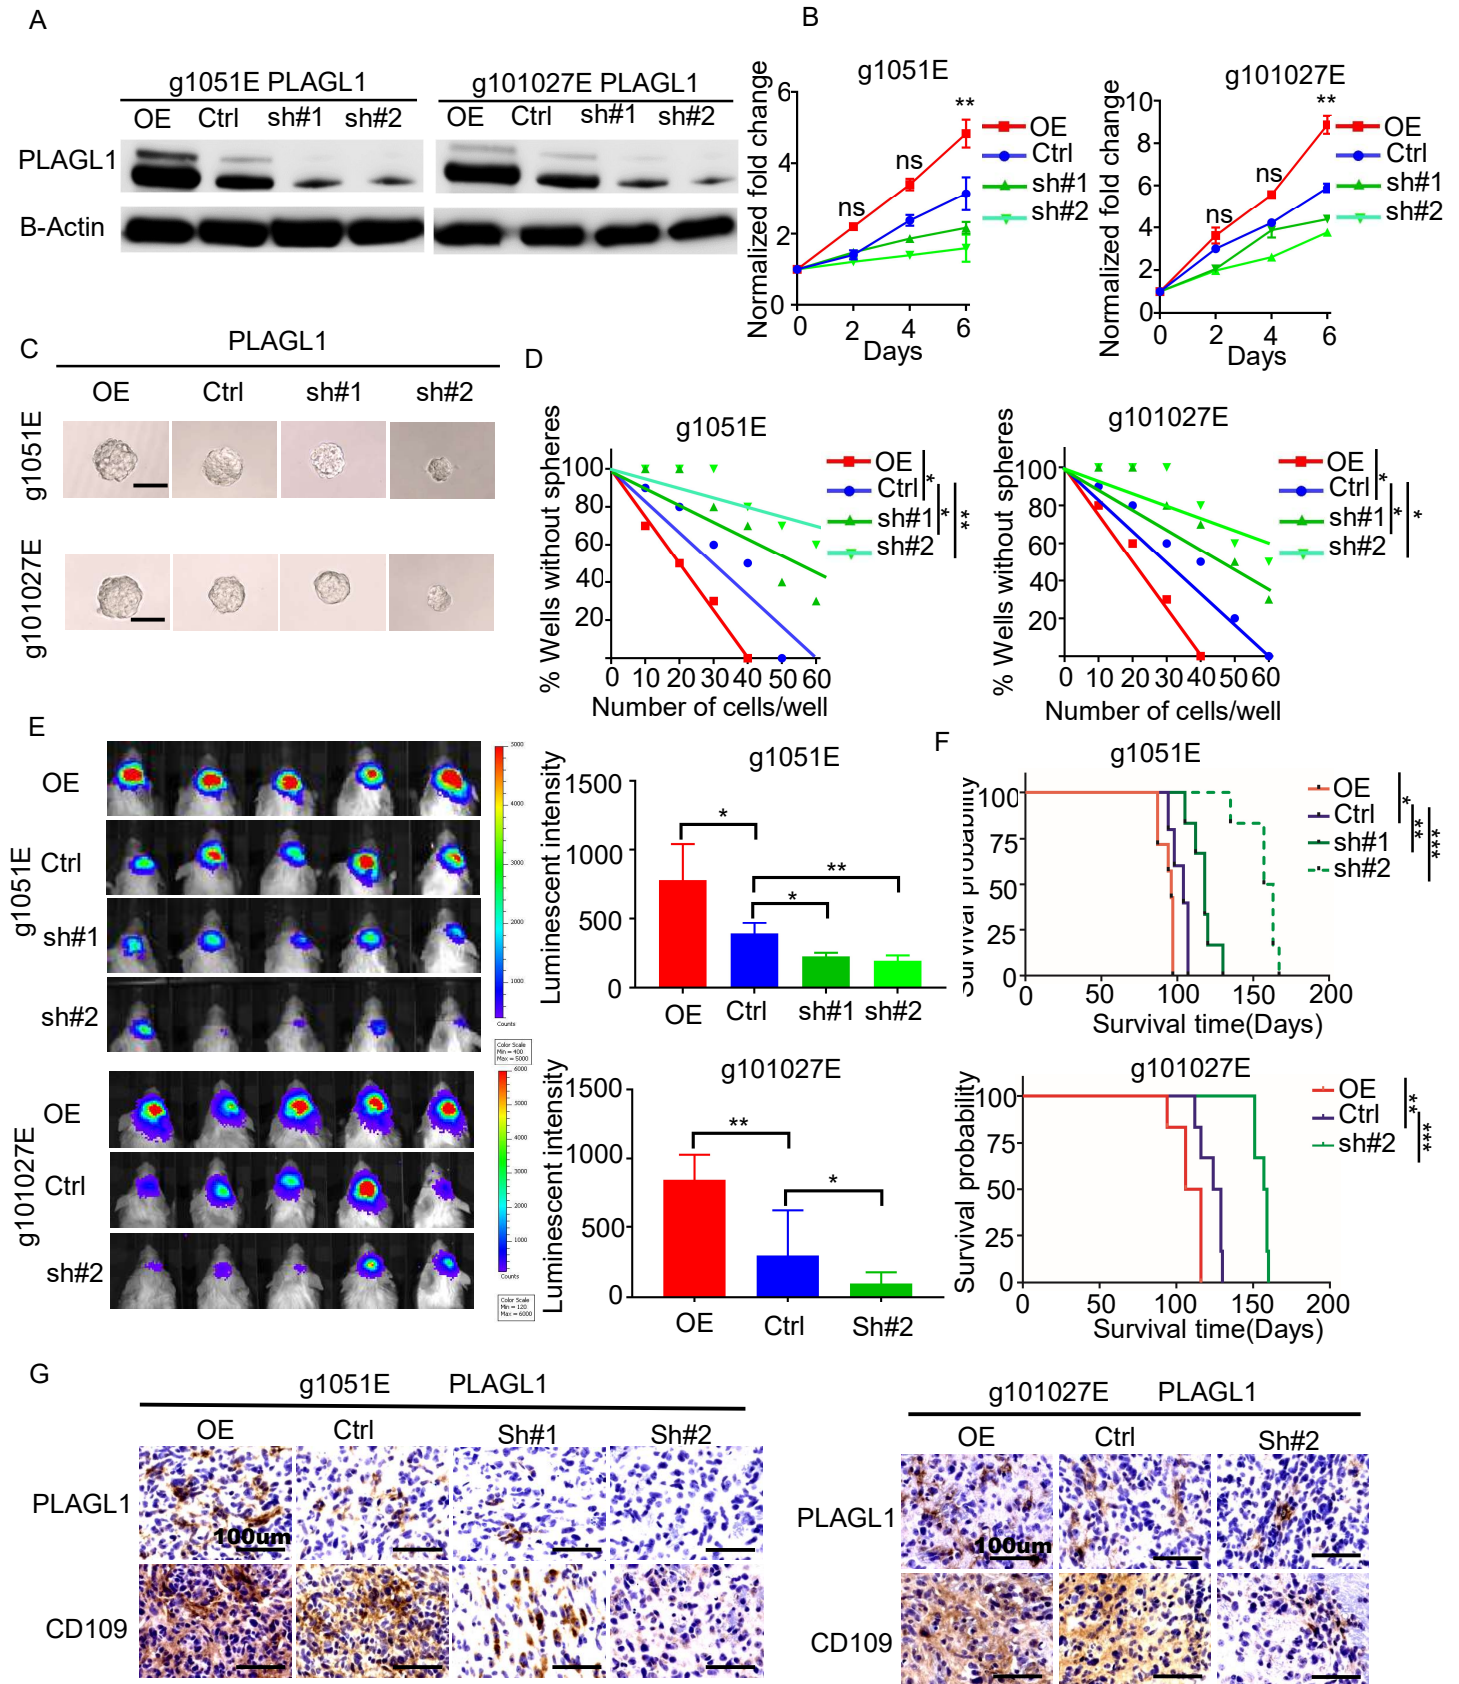

## Figure.4

A

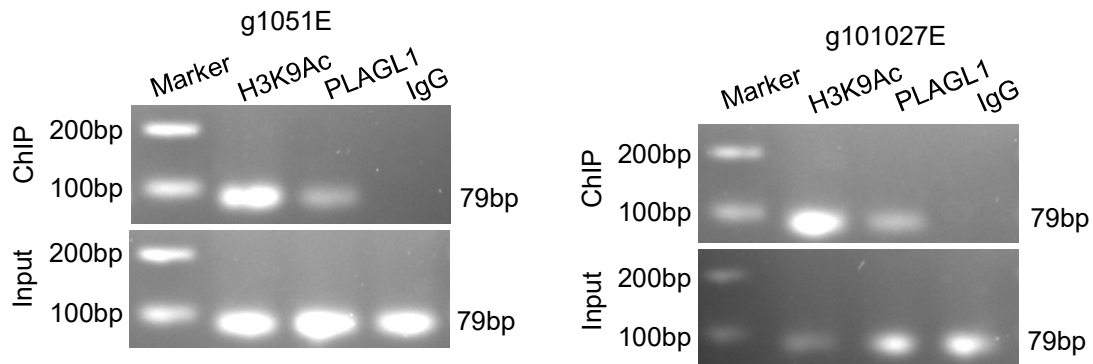

B

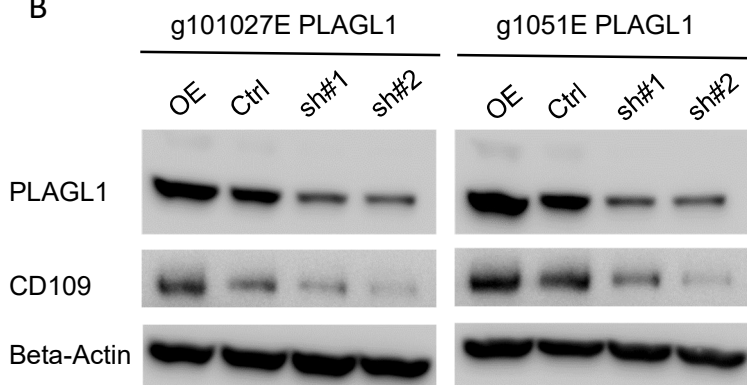

## Figure 5

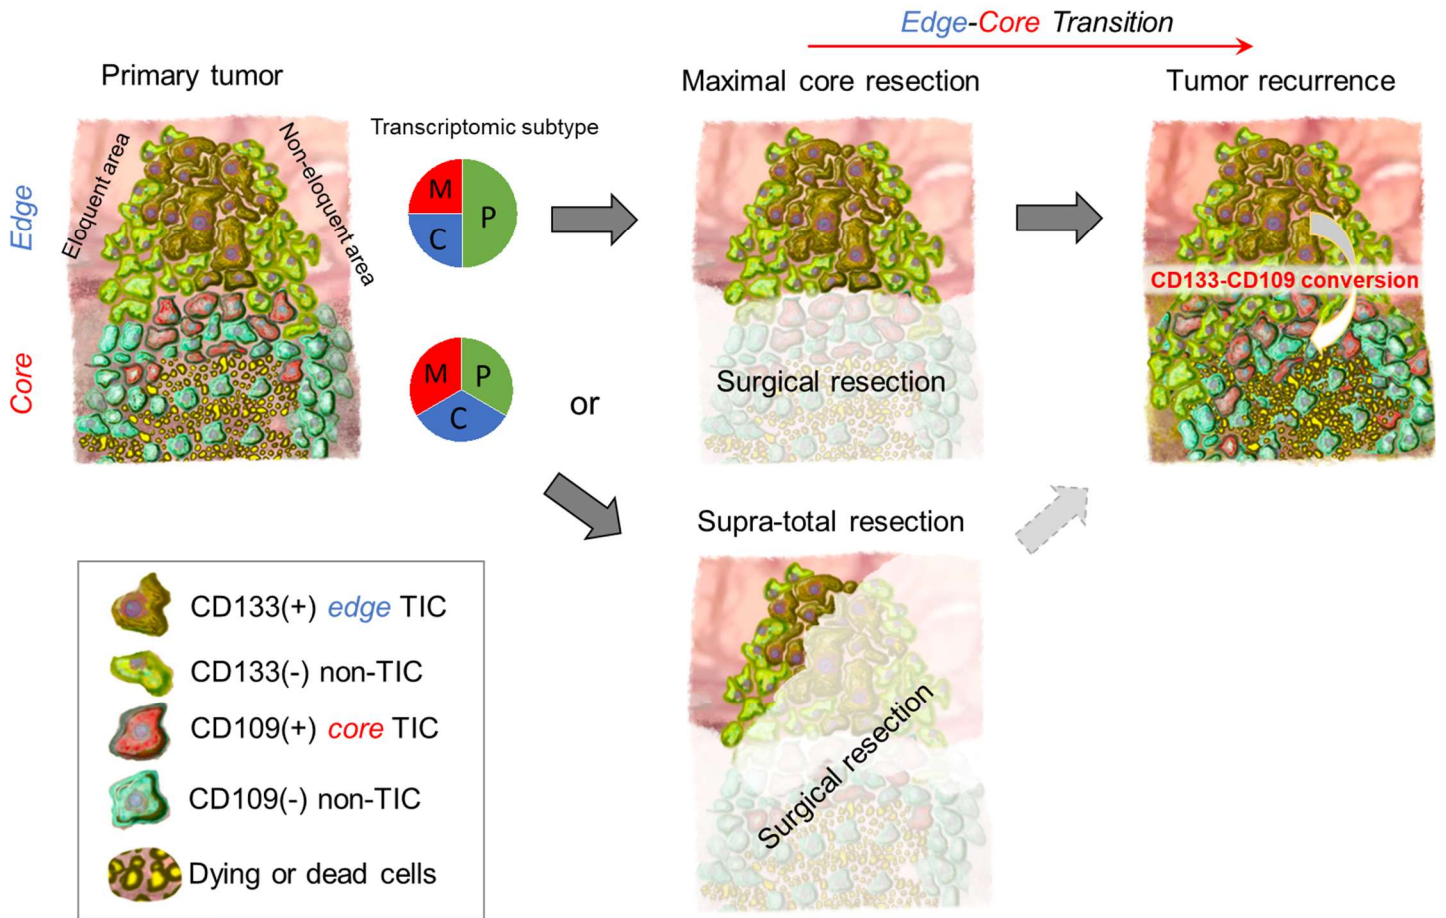

Source: https://biorxiv.org/content/10.1101/2020.09.14.293753v1.full.pdf
